# Supplementary material for: Screening of candidate G-quadruplex ligands for the human c-KIT promotorial region and their effects in multiple in-vitro models
Source: PubMed Central journal article supplement (PMC5008313; doi:10.18632/oncotarget.7808), 2016-03-01
Supplement: oncotarget-07-21658-s001.pdf [file oncotarget-07-21658-s001.pdf]

## SUPPLEMENTARY SCHEMES, FIGURES AND TABLES

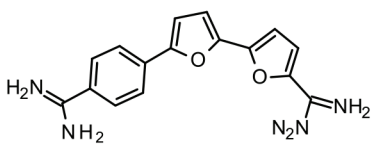

HAD1

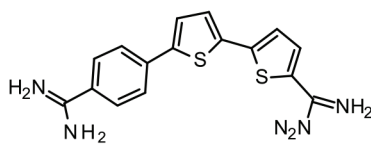

HAD2

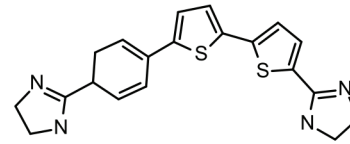

HAD3

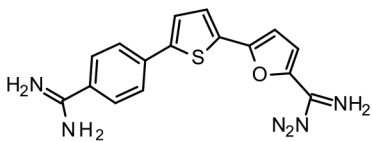

HAD4

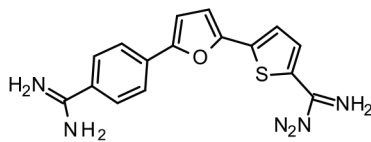

HAD5

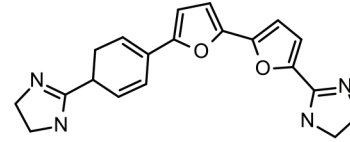

HAD6

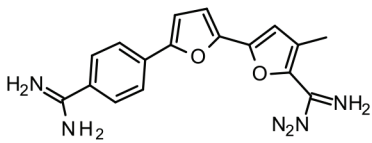

HAD7

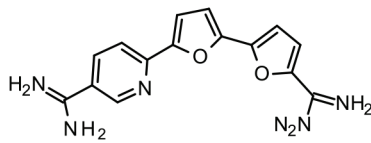

HAD8

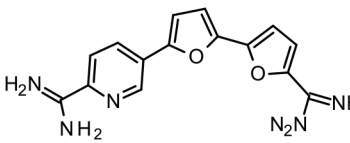

HAD9

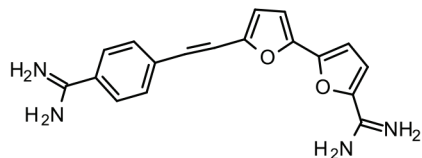

HAD10

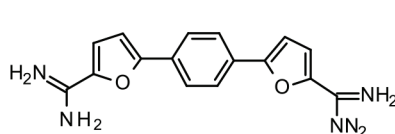

HAD11

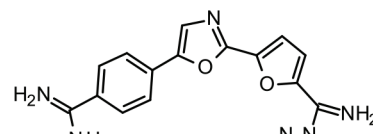

HAD12

Supplementary Scheme S1: Chemical structures of tested HAD derivatives.

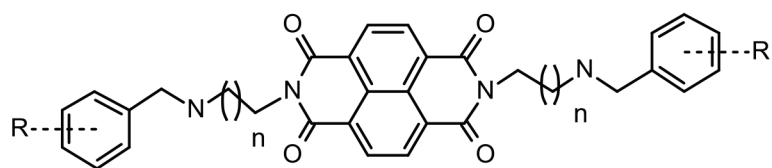

| Compound | n | R                      |
|----------|---|------------------------|
| NDI1     | 2 | 2-OCH <sub>3</sub>     |
| NDI2     | 1 | 2-OCH <sub>3</sub>     |
| NDI3     | 2 | 2,3,4-OCH <sub>3</sub> |
| NDI4     | 2 | 3,4,5-OCH <sub>3</sub> |
| NDI5     | 2 | H                      |

Supplementary Scheme S2: Chemical structures of tested NDI derivatives.

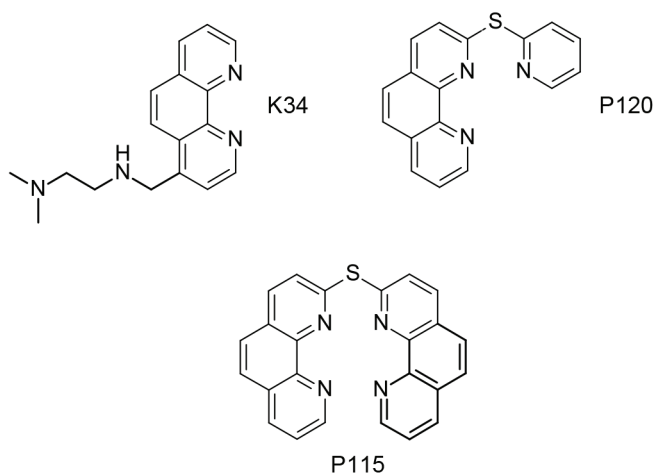

Supplementary Scheme S3: Chemical structures of tested Phen derivatives.

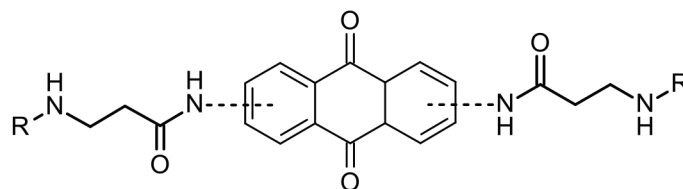

| Compound | R       | Position |
|----------|---------|----------|
| AQ1      | Lys     | 1,5      |
| AQ2      | Lys     | 1,8      |
| AQ3      | Lys     | 2,6      |
| AQ4      | Lys     | 2,7      |
| AQ5      | Phe-Lys | 1,5      |
| AQ6      | Phe-Lys | 1,8      |
| AQ7      | Phe-Lys | 2,6      |
| AQ8      | Phe-Lys | 2,7      |

Supplementary Scheme S4: Chemical structures of tested AQ derivatives.

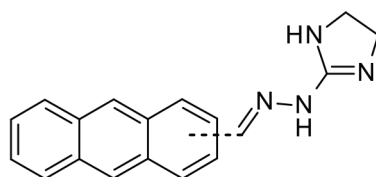

| Compound | Position |
|----------|----------|
| AN1      | 1        |
| AN2      | 2        |
| AN3      | 9        |
| AN4      | 9,10     |
| AN5      | 1,5      |
| AN6      | 1,8      |
| AN7      | 2,6      |
| AN8      | 2,7      |

Supplementary Scheme S5: Chemical structures of tested AN derivatives.

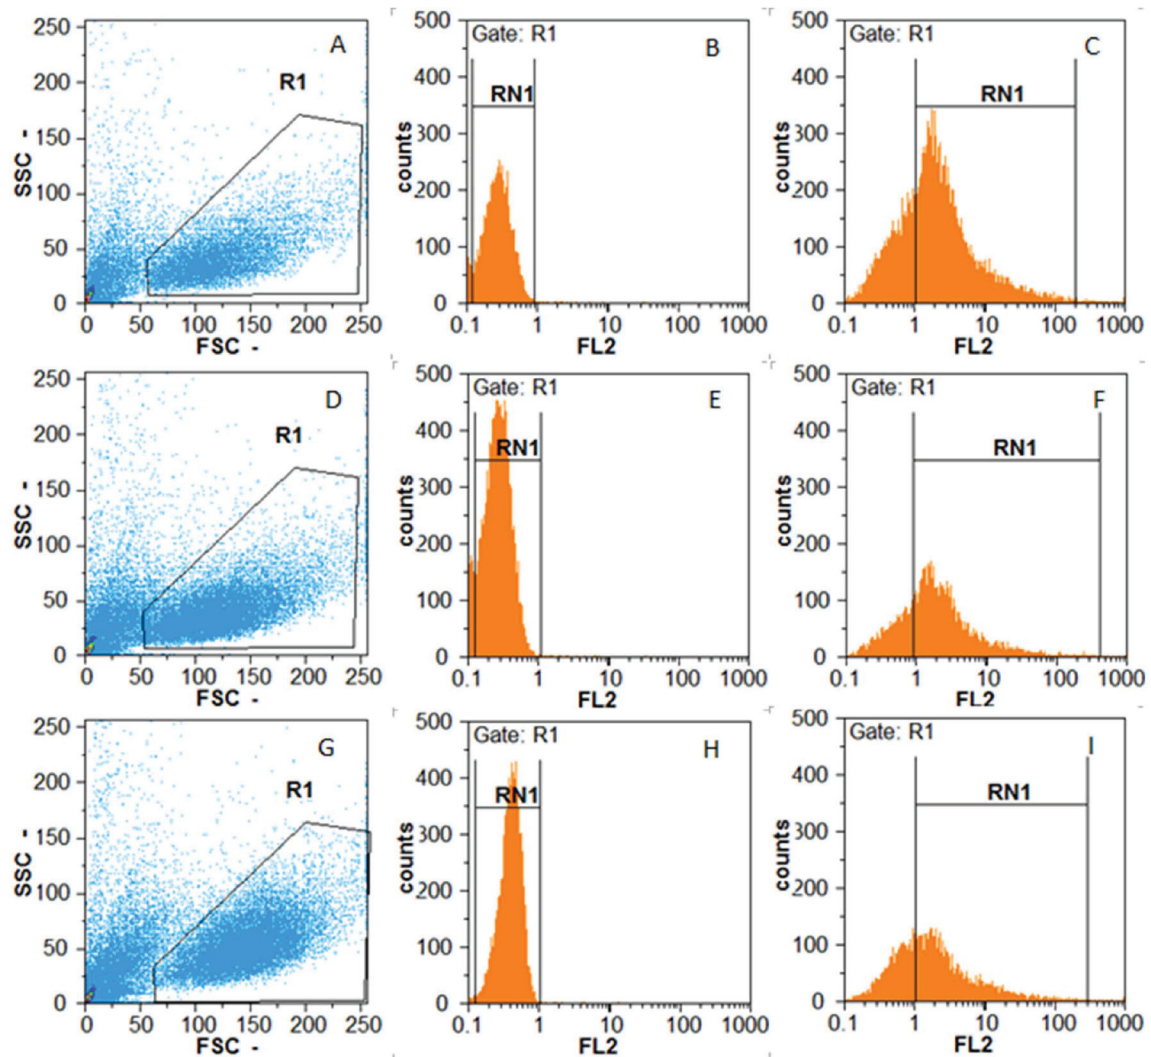

**Supplementary Figure S1: Evaluation of CD117 expression in HCG27 cells after 48h of incubation.** Control sample: **A.** morphological scatter (forward scatter, FSC; side scatter, SSC); **B.** isotype control, histogram; **C.** CD117 expression, histogram. HCG27 cells incubated with DMSO **D.** morphological scatter (forward scatter, FSC; side scatter, SSC); **E.** isotype control, histogram; **F.** CD117 expression, histogram. HCG27 cells incubated with AQ1 1  $\mu$ M: **G.** morphological scatter (forward scatter, FSC; side scatter, SSC); **H.** isotype control, histogram **I.** CD117 expression, histogram.

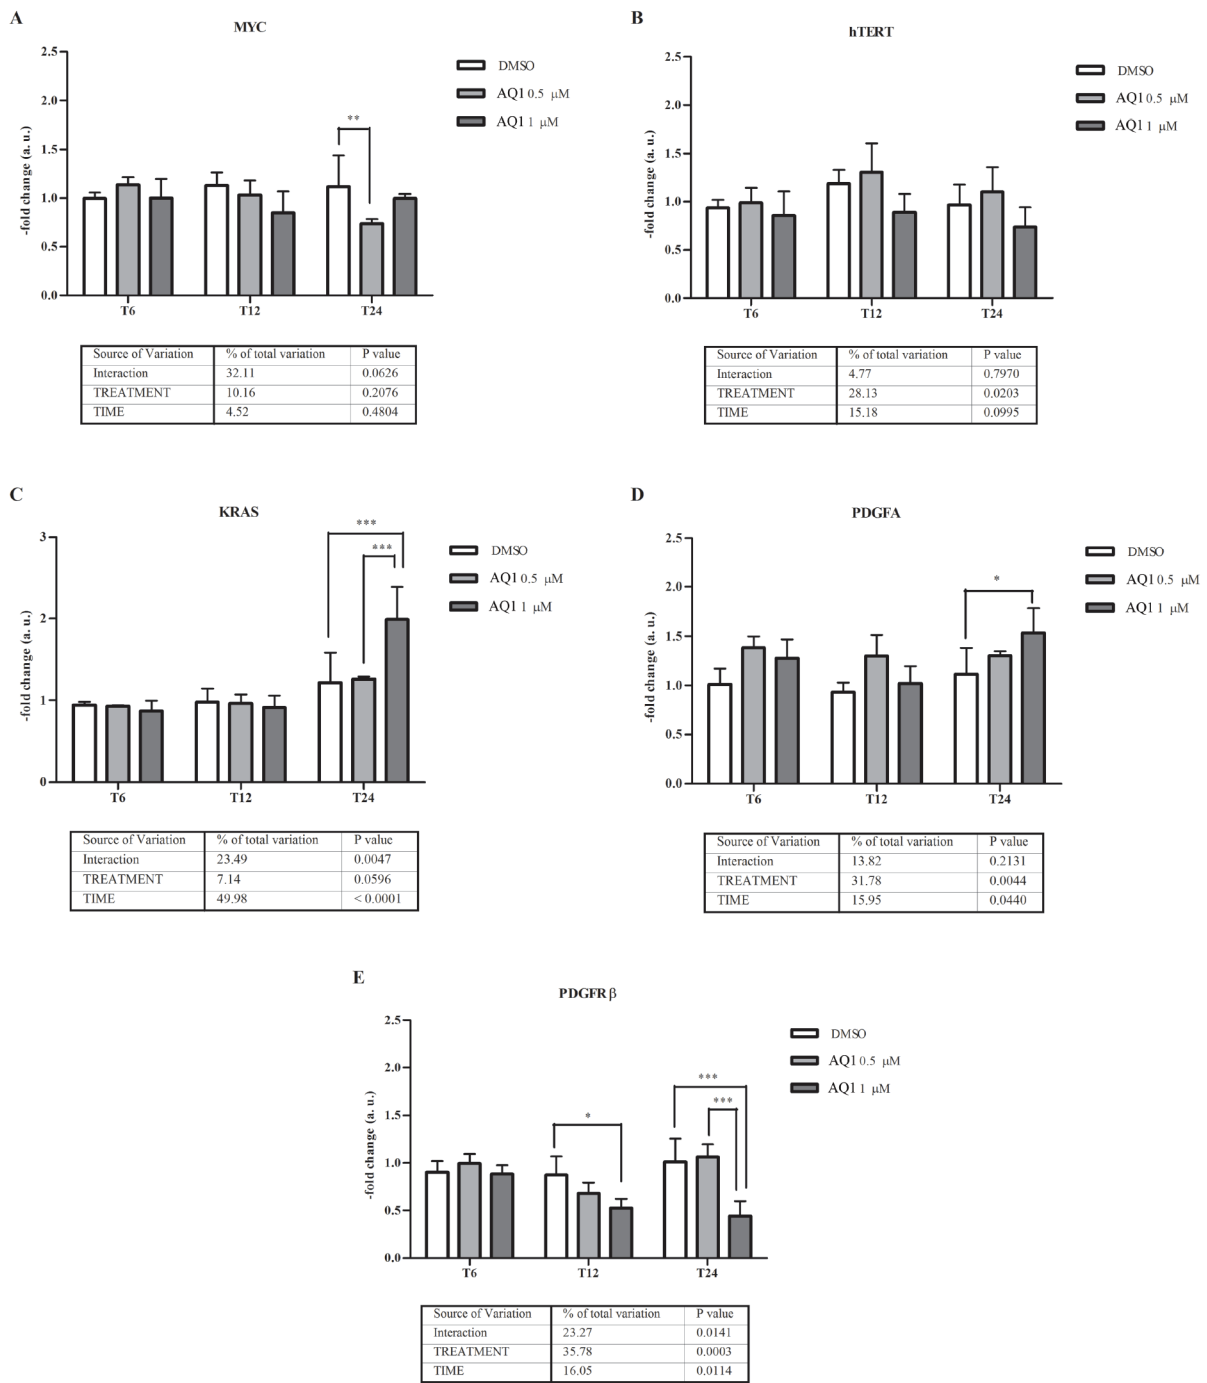

**Supplementary Figure S2: Effect of AQ1 on mRNA of other oncogenes possessing G4 structures in the HGC27 cell line.** A. *MYC*, B. *hTERT*, C. *KRAS*, D. *PDGFA* and E. *PDGFRβ* mRNA levels were measured using qPCR assays, and data (arithmetic means ± S.D.) are expressed as n-fold change (arbitrary units, a.u.) normalized to the RQ of control cells at each time (T<sub>6</sub>, T<sub>12</sub>, T<sub>24</sub>), to whom an arbitrary value of 1 was assigned. Two-way ANOVA and Bonferroni post-test were used to identify statistical differences between doses and time of treatment. \*,\*\*,\*\*\*:  $P < 0.05$ ;  $P < 0.01$ ;  $P < 0.001$ .

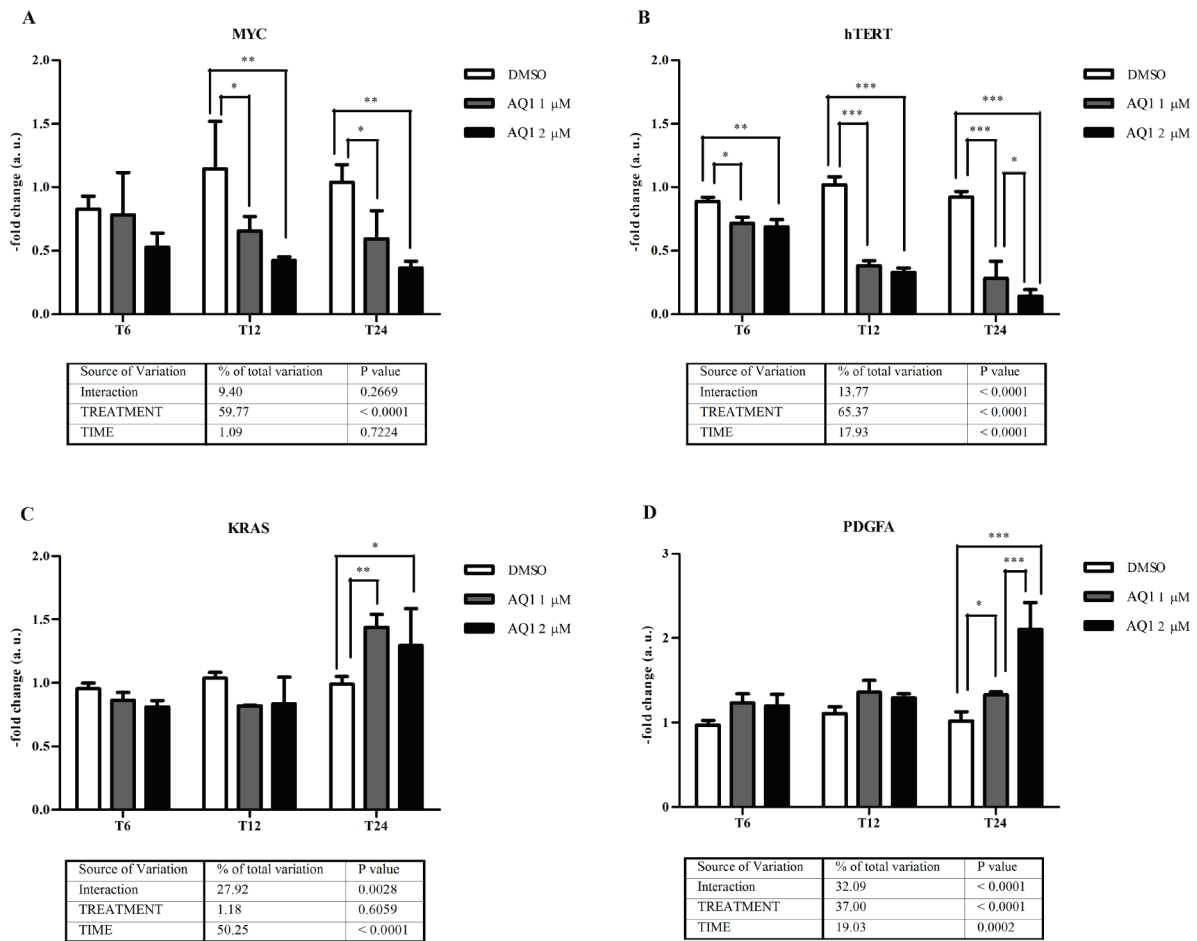

**Supplementary Figure S3: Effect of AQ1 on mRNA of oncogenes possessing G4 structures in MCF7 cell line.** A. *MYC*, B. *hTERT*, C. *KRAS* and D. *PDGFA* mRNA levels were measured using qPCR assays, and data (arithmetic means  $\pm$  S.D.) are expressed as n-fold change (arbitrary units, a.u.) normalized to the RQ of control cells at each time ( $T_6$ ,  $T_{12}$ ,  $T_{24}$ ), to whom an arbitrary value of 1 was assigned. Two-way ANOVA and Bonferroni post-test were used to identify statistical differences between doses and time of treatment. \*, \*\*, \*\*\*:  $p < 0.05$ ;  $p < 0.01$ ;  $p < 0.001$ .

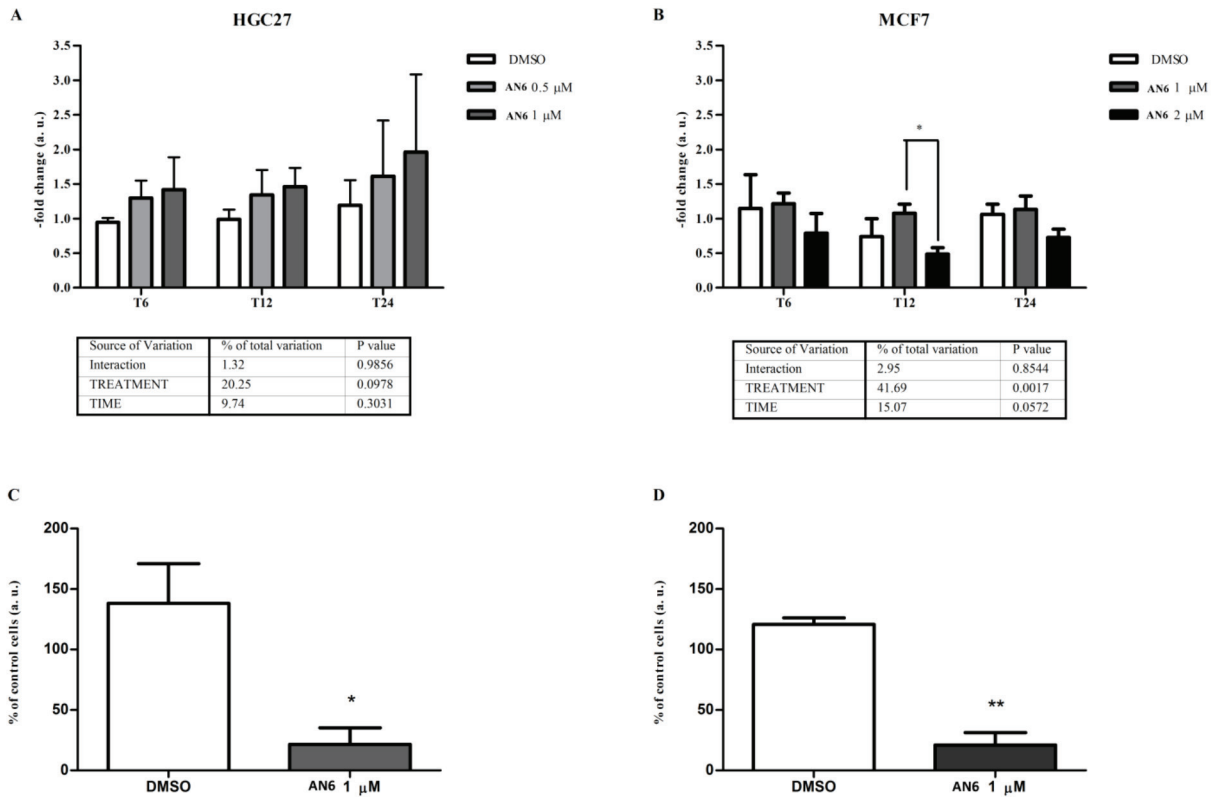

**Supplementary Figure S4: Effect of AN6 on *c-KIT* mRNA and protein expression in HGC27 and MCF7 cell lines.** *c-KIT* mRNA levels **A.** and **B.** were measured using a qPCR approach, and data (arithmetic means  $\pm$  S.D.) are expressed as n-fold change (a. u.) normalized to the RQ value of control cells at each time ( $T_6$ ,  $T_{12}$ ,  $T_{24}$ ), to whom an arbitrary value of 1 was assigned. The two-way ANOVA followed by Bonferroni post-test were used to identify statistical differences between ligand concentrations and time of treatment. The *c-kit* protein amount **C.** and **D.** was measured by flow cytometry, and data are expressed as n-fold change (%) of the mean fluorescence intensity (MFI) of untreated cells. The Student t-test was used to identify statistical differences between cells exposed to AN6 and those incubated with the vehicle (DMSO).\*:  $P < 0.05$ ; \*\*:  $P < 0.01$ .

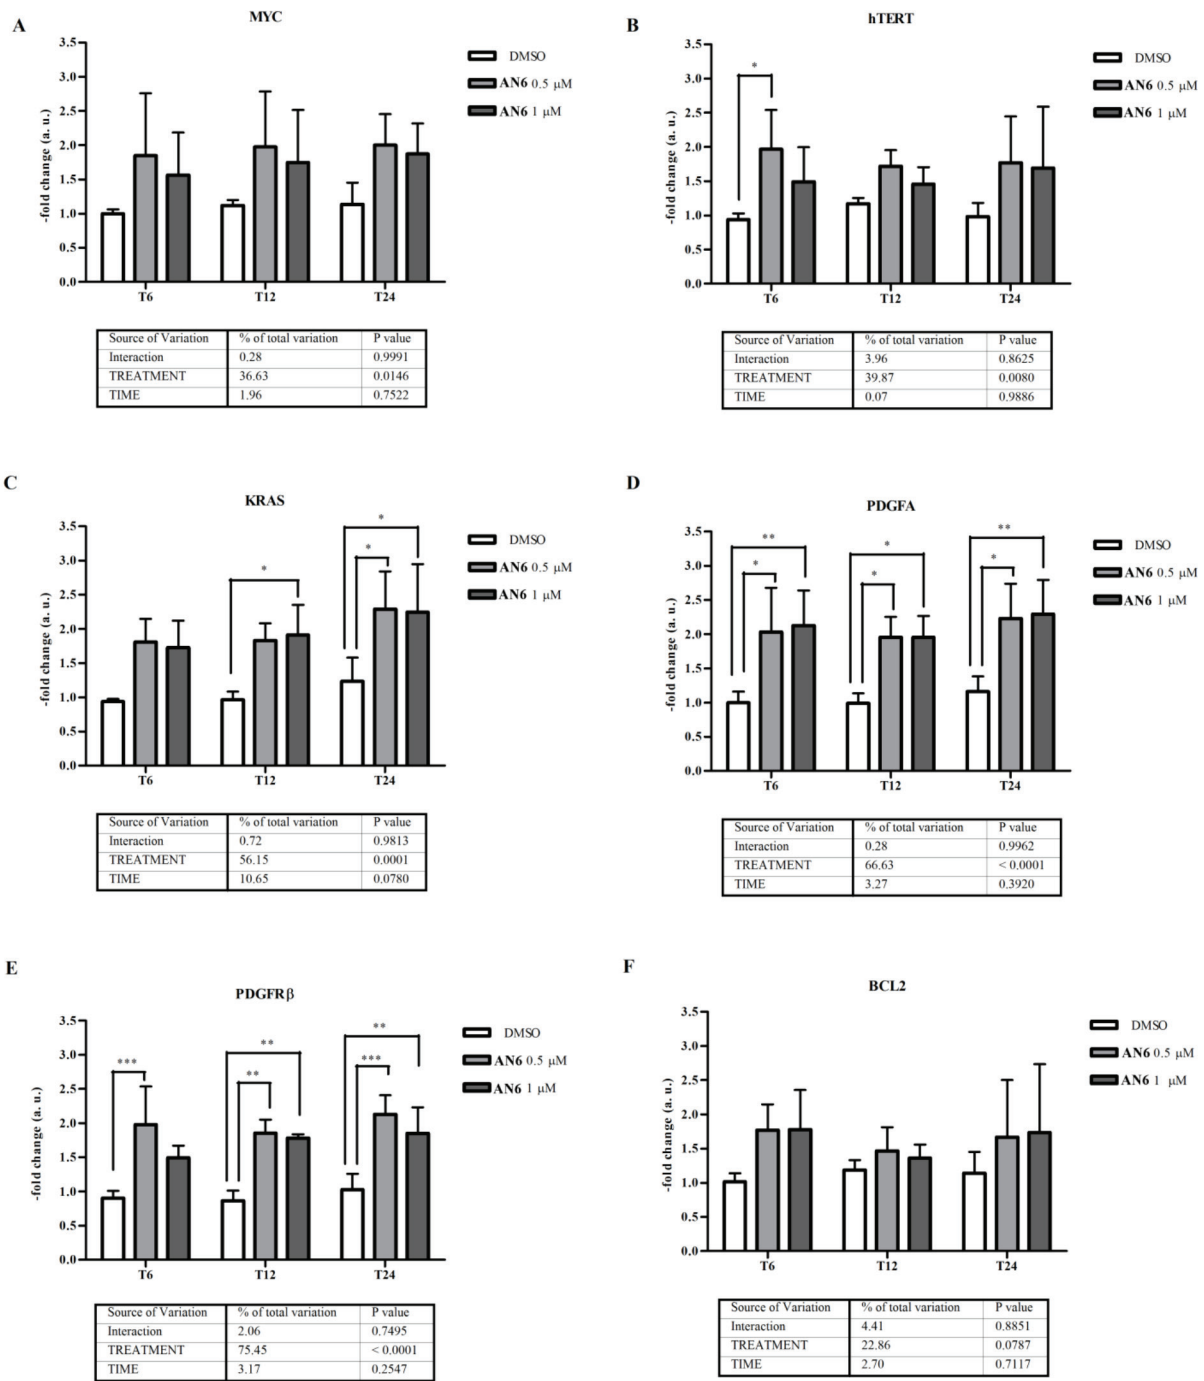

**Supplementary Figure S5: Effect of treatment with AN6 on mRNA of oncogenes possessing G4 structures in the HGC27 cell line.** A. *MYC*, B. *hTERT*, C. *KRAS*, D. *PDGFA*, E. *PDGFR $\beta$* , and F. *BCL2* mRNA levels were measured using qPCR assays, and data (arithmetic means  $\pm$  S.D.) are expressed as n-fold change (a.u.) normalized to the RQ of control cells at each time ( $T_6$ ,  $T_{12}$ ,  $T_{24}$ ) to which an arbitrary value of 1 was assigned. Two-way ANOVA and Bonferroni post-test were used to assess statistical differences between doses and time of treatment. \*, \*\*, \*\*\*:  $p < 0.05$ ;  $p < 0.01$ ;  $p < 0.001$ .



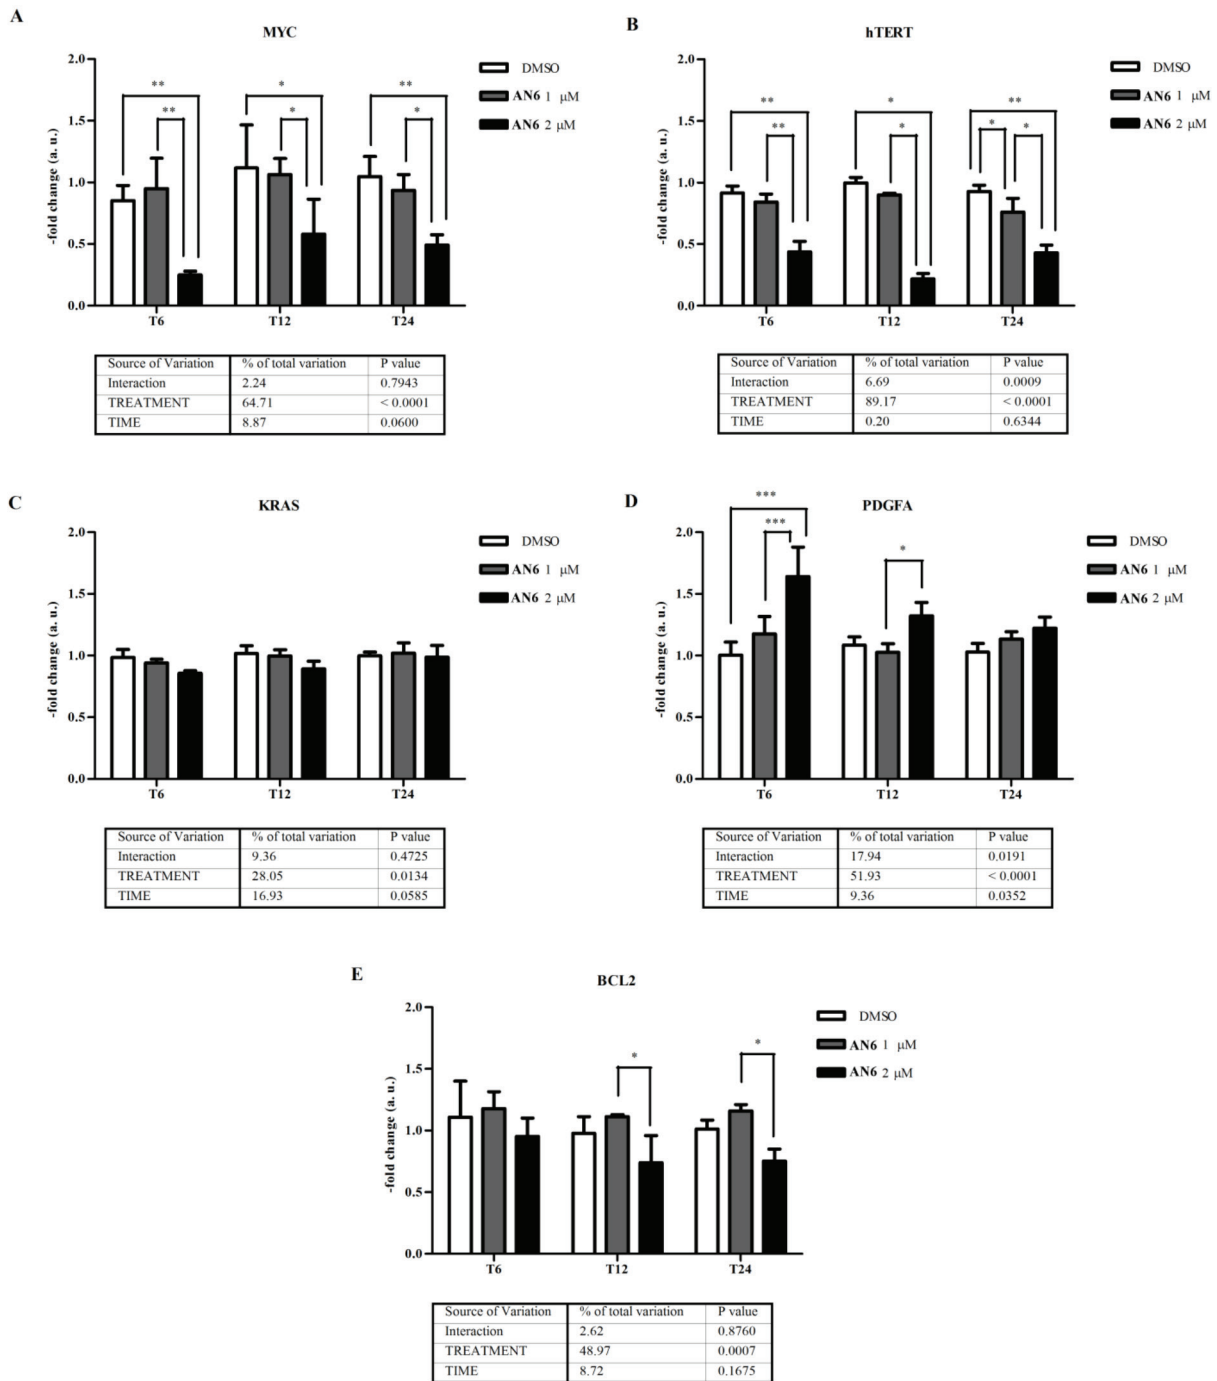

**Supplementary Figure S6: Effect of exposure with AN6 on mRNA of oncogenes possessing G4 structures in the MCF7 cell line.** A. *MYC*, B. *hTERT*, C. *KRAS*, D. *PDGFA* and E. *BCL2* mRNA level were measured by using a qPCR assay, and data (arithmetic means  $\pm$  S.D.) are expressed as n-fold change (a. u.) normalized to the RQ of control cells at each time (T<sub>6</sub>, T<sub>12</sub>, T<sub>24</sub>) to which an arbitrary value of 1 was assigned. Two-way ANOVA followed by Bonferroni post-test was used to assess statistical differences between doses and time of treatment. \*, \*\*, \*\*\*: p<0.05; p<0.01; p<0.001.

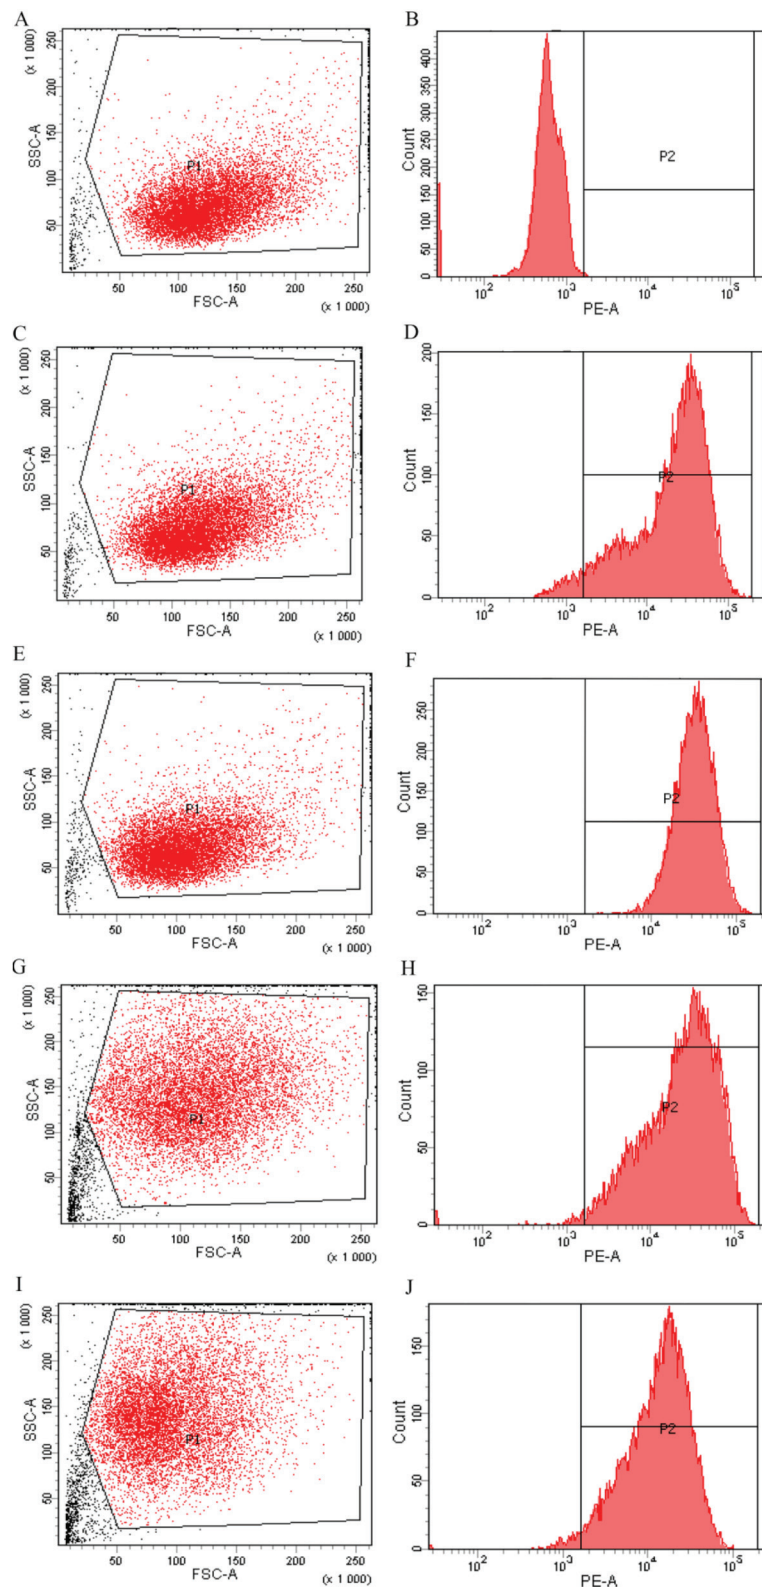

**Supplementary Figure S7: Flow cytometry analysis of CD117 in the  $\alpha 155$  cell line.** Morphological scatter plot with forward scatter (FSC) vs side scatter (SSC) and c-kit histogram plot of fluorescence intensity (FI) of different samples: **A.** and **B.** irrelevant antibody IgG; **C.** and **D.** control cells; **E.** and **F.** DMSO treated cells FI; **G.** and **H.** AQ1 1  $\mu$ M treated cells; **I.** and **J.** AQ1 2  $\mu$ M treated cells.

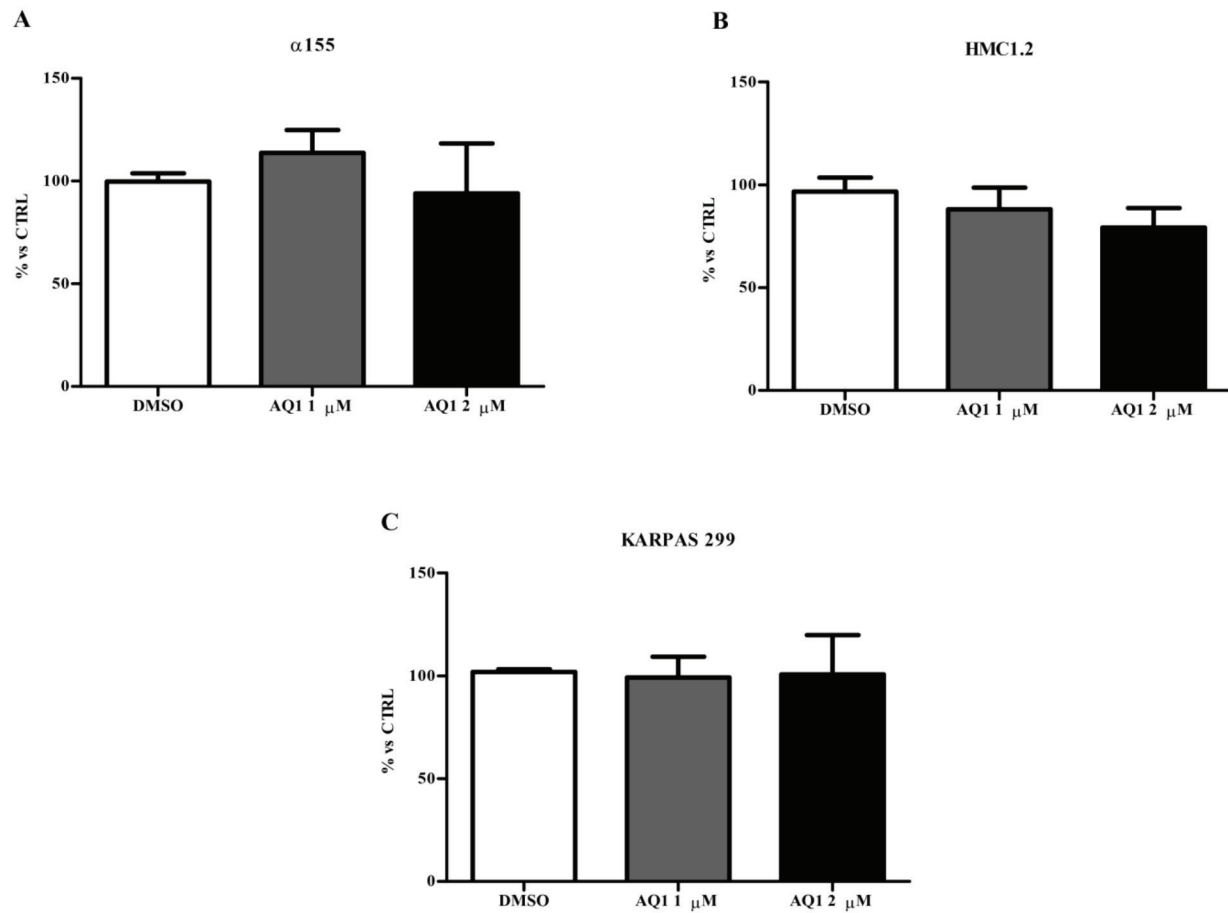

**Supplementary Figure S8: Effect of treatment with AQ1 on HLA proteins of  $\alpha$ 155 A. HMC1.2 B. and KARPAS299 C.** The HLA protein amounts were measured by flow cytometry and data are expressed as percentage of the fluorescence intensity (FI) measured in untreated cells (control). One-way ANOVA with Bonferroni post-test were used to assess statistical differences between cell treated with AQ1 and those treated with the vehicle (DMSO).

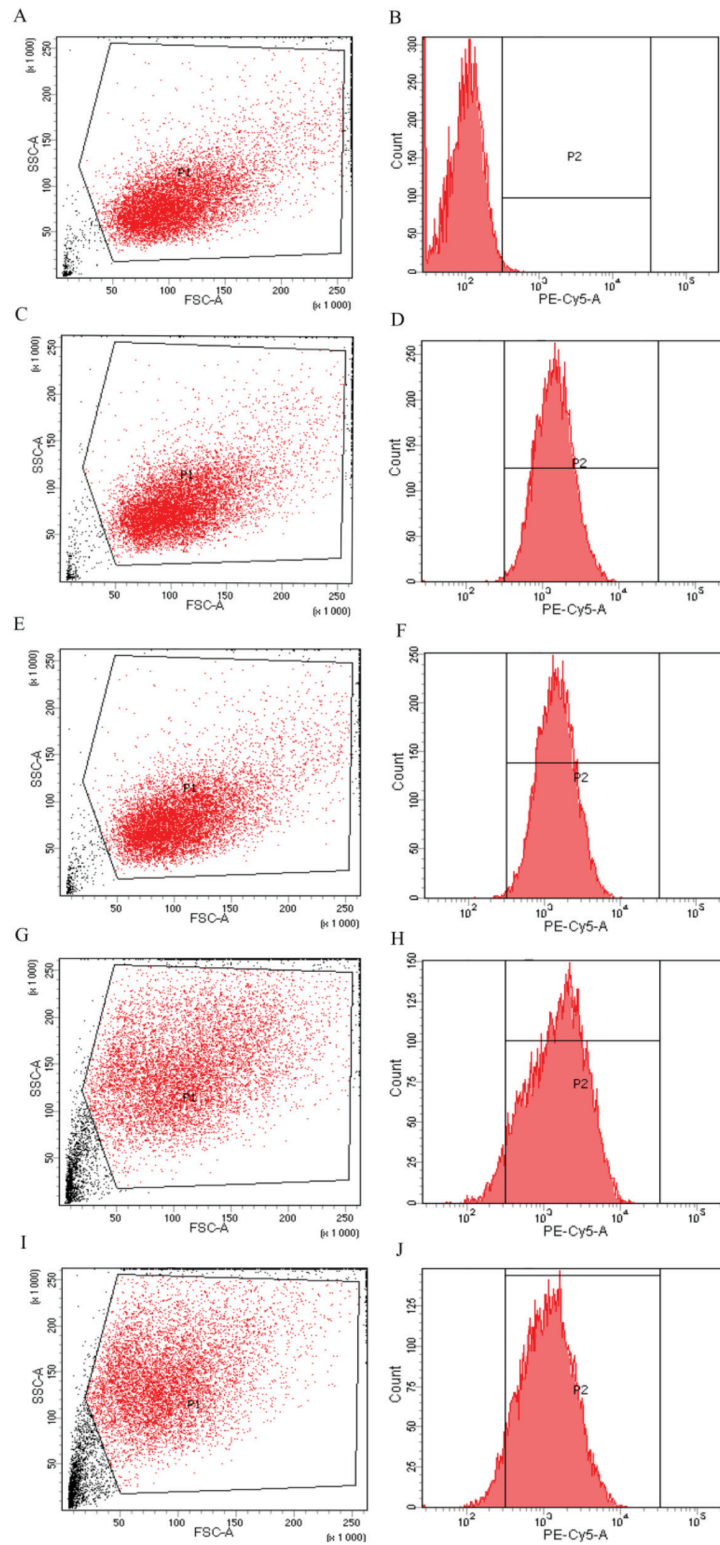

**Supplementary Figure S9: Flow cytometry analysis of HLA in  $\alpha 155$  cell line.** Morphological scatter plot with forward scatter (FSC) vs side scatter (SSC) and HLA histogram plot of fluorescence intensity (FI) of different samples. **A.** and **B.** irrelevant antibody IgG; **C.** and **D.** control cells; **E.** and **F.** DMSO treated cells FI; **G.** and **H.** AQ1 1  $\mu$ M treated cells; **I.** and **J.** AQ1 2  $\mu$ M treated cells.

**Supplementary Table S1: Library of tested compounds and variation of the melting temperature they induced at 1  $\mu$ M concentration of each tested DNA sequence**

| Compounds    | Ref.                                    | Kit1 | Kit2 | HTS  | dsDNA |
|--------------|-----------------------------------------|------|------|------|-------|
| HAD1         | DB832 <sup>a</sup>                      | 12.5 | 13.3 | 10.9 | 2.4   |
| HAD2         | DB1450 <sup>a</sup>                     | 21.8 | 11.3 | 12.8 | 12.1  |
| HAD3         | DB2037 <sup>a</sup>                     | 19.6 | 17.5 | 16.8 | 7.8   |
| HAD4         | DB1463 <sup>a</sup>                     | 10.1 | 1.2  | 7.3  | 2.0   |
| HAD5         | DB1438 <sup>a</sup>                     | 3.5  | 11.0 | 13.3 | 1.2   |
| HAD6         | DB1972 <sup>a</sup>                     | 14.0 | 13.1 | 9.9  | 4.2   |
| HAD7         | DB1949 <sup>a</sup>                     | 15.7 | 13.4 | 12.6 | 2.6   |
| HAD8         | DB934 <sup>a</sup>                      | 7.4  | 5.8  | 5.0  | 2.9   |
| HAD9         | DB1693 <sup>a</sup>                     | 12.1 | 9.5  | 9.4  | 2.2   |
| HAD10        | DB1694 <sup>a</sup>                     | 10.6 | 13.9 | 5.6  | 1.1   |
| HAD11        | DB1093 <sup>a</sup>                     | 12.9 | 13.4 | 11.7 | 11.5  |
| HAD12        | DB1999 <sup>a</sup>                     | 8.1  | 13.1 | 4.9  | 2.4   |
| NDI1         | 2 <sup>b</sup>                          | 1.5  | 8.3  | 10.3 | 3.0   |
| NDI2         | 1 <sup>b</sup>                          | 0.6  | 0.7  | 9.2  | 2.8   |
| NDI3         | 20 <sup>b</sup>                         | 2.0  | 3.3  | 13.5 | 4.4   |
| NDI4         | 22 <sup>b</sup>                         | 0.4  | 0.7  | 7.0  | 1.9   |
| NDI5         | 8 <sup>b</sup>                          | 0.2  | 0.5  | 10.1 | 5.0   |
| Phen1        | K34 <sup>c</sup>                        | 0.0  | 0.0  | 0.1  | 0.0   |
| Phen1_Ni(II) | (K34) <sub>2</sub> Ni(II) <sup>c</sup>  | 1.9  | 0.0  | 3.1  | 0.0   |
| Phen2        | P120 <sup>d</sup>                       | 0.0  | 0.0  | 0.1  | 0.0   |
| Phen2_Ni(II) | (P120) <sub>2</sub> Ni(II) <sup>d</sup> | 1.8  | 0.0  | 10.0 | 0.0   |
| Phen3        | P115 <sup>e</sup>                       | 2.5  | 5.2  | 0.1  | 0.0   |
| Phen3_Ni(II) | (P115)Ni(II) <sup>e</sup>               | 30.9 | 30.6 | 23.6 | 0.3   |
| AQ1          | D-13 <sup>f</sup>                       | 13.1 | 15.3 | 18.0 | 4.6   |
| AQ2          | E-13 <sup>f</sup>                       | 6.7  | 8.4  | 18.9 | 4.5   |
| AQ3          | B-13 <sup>f</sup>                       | 9.9  | 12.9 | 14.2 | 2.5   |
| AQ4          | C-13 <sup>f</sup>                       | 5.2  | 5.1  | 9.9  | 1.4   |
| AQ5          | D-15 <sup>f</sup>                       | 10.2 | 6.0  | 18.2 | 1.2   |
| AQ6          | E-15 <sup>f</sup>                       | 13.0 | 1.7  | 4.5  | 0.1   |
| AQ7          | B-15 <sup>f</sup>                       | 9.5  | 11.1 | 7.0  | 0.3   |
| AQ8          | C-15 <sup>f</sup>                       | 4.0  | 6.4  | 4.3  | 0.1   |
| AN1          | Ant1 <sup>g</sup>                       | 0.0  | 2.4  | 1.0  | 1.2   |
| AN2          | Ant2 <sup>g</sup>                       | 0.0  | 0.1  | 0.3  | 0.6   |
| AN3          | Ant9 <sup>g</sup>                       | 0.0  | 0.2  | 1.0  | 1.6   |
| AN4          | Ant9,10 <sup>g</sup>                    | 5.0  | 6.5  | 1.7  | 0.9   |

(Continued)

| Compounds | Ref.                | Kit1 | Kit2 | HTS  | dsDNA |
|-----------|---------------------|------|------|------|-------|
| AN5       | Ant1,5 <sup>g</sup> | 2.0  | 6.7  | 13.6 | 0.5   |
| AN6       | Ant1,8 <sup>g</sup> | 5.2  | 8.0  | 3.0  | 0.8   |
| AN7       | Ant2,6 <sup>g</sup> | 4.4  | 7.2  | 4.7  | 0.1   |
| AN8       | Ant2,7 <sup>g</sup> | 1.2  | 3.6  | 2.0  | 0.1   |

Errors were  $\pm 0.4$  °C. The compound name previously used and the corresponding reference are reported in the ref column.

<sup>a</sup>: Nanjunda R, Musetti C, Kumar A, Ismail MA, Farahat AA, Wang S, Sissi C, Palumbo M, Boykin DW, Wilson WD.

Heterocyclic dications as a new class of telomeric G-quadruplex targeting agents. *Curr Pharm Des.* 2012; 18: 1934-1947.

<sup>b</sup>: Milelli A, Tumiatti V, Micco M, Rosini M, Zuccari G, Raffaghello L, Bianchi G, Pistoia V, Díaz JF, Pera B, Trigili C, Barasoain I, Musetti C, et al. Structure-activity relationships of novel substituted naphthalene diimides as anticancer agents. *Eur J Med Chem.* 2012; 57: 417-428.

<sup>c</sup>: Musetti C, Lucatello L, Bianco S, Krapcho AP, Cadamuro SA, Palumbo M, Sissi C. Metal ion-mediated assembly of effective phenanthroline-based G-quadruplex ligands. *Dalton Trans.* 2009; 21: 3657-3660.

<sup>d</sup>: Bianco S, Musetti C, Krapcho AP, Palumbo M, Sissi C. Ni<sup>2+</sup> and Cu<sup>2+</sup> complexes of a phenanthroline-based ligand bind to G-quadruplexes at non-overlapping sites. *Chem Commun (Camb).* 2013; 49: 8057-8059.

<sup>e</sup>: Bianco S, Musetti C, Waldeck A, Sparapani S, Seitz JD, Krapcho AP, Palumbo M, Sissi C. Bis-phenanthroline derivatives as suitable scaffolds for effective G-quadruplex recognition. *Dalton Trans.* 2010; 39: 5833-5841.

<sup>f</sup>: Zagotto G, Ricci A, Vasquez E, Sandoli A, Benedetti S, Palumbo M, Sissi C. Tuning G-quadruplex vs double-stranded DNA recognition in regioisomeric lysyl-peptidyl-anthraquinone conjugates. *Bioconjug Chem.* 2011; 22: 2126-2135.

<sup>g</sup>: Folini M, Pivetta C, Zagotto G, De Marco C, Palumbo M, Zaffaroni N, Sissi C. Remarkable interference with telomeric function by a G-quadruplex selective bisantrene regioisomer. *Biochem Pharmacol.* 2010; 70: 1781-1790.

**Supplementary Table S2: qPCR and flow cytometry experimental settings chosen for each cell line and ligand tested in the study**

| Cell line | Ligand | IC <sub>50</sub> (μM) | Ligand concentrations for qPCR assay (μM) | Analyzed exposure times (qPCR) | Ligand concentrations for flow cytometry assay (μM) | Analyzed exposure times (flow cytometry) |
|-----------|--------|-----------------------|-------------------------------------------|--------------------------------|-----------------------------------------------------|------------------------------------------|
| HCG27     | AQ1    | 1.65                  | 0.5 – 1.0                                 | T6, T12, T24                   | 1.0 – 2.0 <sup>a</sup>                              | T48                                      |
|           | AQ7    | > 10.0                | 10.0 <sup>b</sup>                         | T6, T12, T24                   | --                                                  | --                                       |
|           | AN6    | 2.04                  | 0.5 – 1.0                                 | T6, T12, T24                   | 1.0                                                 | T48                                      |
| MCF7      | AQ1    | 3.0                   | 1.0 – 2.0                                 | T6, T12, T24                   | 1.0 – 2.0 <sup>a</sup>                              | T48                                      |
|           | AQ7    | > 10.0                | 10.0 <sup>b</sup>                         | T6, T12, T24                   | --                                                  | --                                       |
|           | AN6    | 2.70                  | 1.0 – 2.0                                 | T6, T12, T24                   | 1.0                                                 | T48                                      |
| α155      | AQ1    | --                    | 1.0                                       | T6, T12                        | 1.0 – 2.0                                           | T48                                      |
| HMC1.2    | AQ1    | --                    | 1.0                                       | T6, T12                        | 1.0 – 2.0                                           | T48                                      |

<sup>a</sup> 2 μM concentration was used only in BCL2 detection experiment (Figure 8); <sup>b</sup> data not shown in the manuscript.

**Supplementary Table S3: Primers and probes used for the qPCR analysis either obtained from previous publications or specifically designed for this study**

| Gene                       | UPL <sup>a</sup> probe | Primers (5'- 3')                                                               | Source                  |
|----------------------------|------------------------|--------------------------------------------------------------------------------|-------------------------|
| <i>MYC</i> <sup>b</sup>    | #67                    | F <sup>l</sup> : TGGTGCTCCATGAGGAGACA<br>R <sup>m</sup> : GTGGCACCTCTTGAGGACCA | Gunaratnam et al., 2009 |
| <i>PDGFA</i> <sup>c</sup>  | #77                    | F: ACACGAGCAGTGTCAAGTGC<br>R: CCTGCAGTATTCCACCTTGG                             | Iqbal et al., 2012      |
| <i>PDGFRB</i> <sup>d</sup> | #14                    | R: TGCTCATCTGTGAAGGCAAG<br>F: TGGCATTGTAGA AACTGCTCG                           | Chanakira et al., 2012  |
| <i>BCL2</i> <sup>e</sup>   | #75                    | F: ATGTGTGTGGAGAGCGTCAA<br>R: GCCGTACAGTTCCACAAAGG                             | Brassesso et al., 2010  |
| <i>B2M</i> <sup>f</sup>    | #42                    | F: AGGCTATCCAGCGTACTCCA<br>R: TGTCGGATGGATGAAACCCA                             | designed <i>ex novo</i> |
| <i>GAPDH</i> <sup>g</sup>  | #60                    | F: CTCTGCTCCTCTGTTCGAC<br>R: ACGACCAAATCCGTTGACTC                              | designed <i>ex novo</i> |
| <i>HPRT1</i> <sup>h</sup>  | #22                    | F: TGATAGATCCATTCCTATGACTGTAGA<br>R: CAAGACATTCTTTCCAGTTAAAGTTG                | designed <i>ex novo</i> |
| <i>KIT</i> <sup>i</sup>    | #29                    | F: GGCACGGTTGAATGTAAGGC<br>R: CAGGGTGTGGGGATGGATTT                             | designed <i>ex novo</i> |
| <i>KRAS</i> <sup>j</sup>   | #62                    | F: GGAGCTGGTGGCGTAGGCAAG<br>R: GCCCTCCCCAGTCCTCATGT                            | designed <i>ex novo</i> |
| <i>hTERT</i> <sup>k</sup>  | #68                    | F: GGAGAACAAGCTGTTTGCGG<br>R: AGCCATACTCAGGGACACCT                             | designed <i>ex novo</i> |

<sup>a</sup>Universal Probe Library; <sup>b</sup>V-Myc Avian Myelocytomatosis Viral Oncogene Homolog; <sup>c</sup>Platelet-Derived Growth Factor Alpha Polypeptide; <sup>d</sup>beta-type platelet-derived growth factor receptor; <sup>e</sup>B-cell lymphoma 2; <sup>f</sup>β-2-Microglobulin; <sup>g</sup>Glyceraldehyde-3-Phosphate Dehydrogenase; <sup>h</sup>Hypoxanthine Phosphoribosyltransferase 1; <sup>i</sup>V-Kit Hardy-Zuckerman 4 Feline Sarcoma Viral Oncogene Homolog; <sup>j</sup>Kirsten rat sarcoma viral oncogene homolog; <sup>k</sup>Telomerase Reverse Transcriptase; <sup>l</sup>forward; <sup>m</sup>reverse.

Supplementary Table S4: qPCR assay standard curve parameters obtained in MCF7 and HGC27 cell lines

| Gene          | MCF7   |                |                    | HGC27  |                |                    |
|---------------|--------|----------------|--------------------|--------|----------------|--------------------|
|               | Slope  | Efficiency (%) | Dynamic range (Ct) | Slope  | Efficiency (%) | Dynamic range (Ct) |
| <i>B2M</i>    | -3,192 | 105,7          | 18,78 - 32,06      | -3,34  | 99,1           | 18,74 - 30,85      |
| <i>BCL2</i>   | -3,41  | 96,5           | 25,82 - 34,13      | -3,27  | 102,2          | 24,90 - 33,43      |
| <i>GAPDH</i>  | -3,48  | 93,7           | 15,81 - 30,59      | -3,28  | 102            | 16,20 - 30,64      |
| <i>HPRT1</i>  | -3,324 | 99,9           | 20,23 - 32,63      | -3,3   | 101            | 20,96 - 33,18      |
| <i>KIT</i>    | -3,137 | 108,3          | 29,01 - 35,78      | -3,531 | 92             | 29,58 - 39,58      |
| <i>KRAS</i>   | -3,34  | 99             | 21,50 - 32,28      | 3,352  | 98,8           | 21,30 - 32,41      |
| <i>MYC</i>    | -3,3   | 100,7          | 26,85 - 33,06      | -3,502 | 93             | 22,47 - 30,89      |
| <i>PDGFA</i>  | -3,169 | 106,8          | 22,97 - 31,68      | -3,18  | 106,3          | 23,87 - 33,02      |
| <i>PDGFRB</i> |        | Not expressed  |                    | -3,36  | 98,4           | 24,84 - 32,28      |
| <i>hTERT</i>  | -3,11  |                | 33,24 - 38,82      | -3,34  | 99,2           | 29,38 - 35,78      |

Supplementary Table S5: qPCR assay standard curve parameters obtained in  $\alpha$ 155 and HMC1.2 cell lines

| Gene         | $\alpha$ 155 |                |                    | HMC1.2 |                |                    |
|--------------|--------------|----------------|--------------------|--------|----------------|--------------------|
|              | Slope        | Efficiency (%) | Dynamic range (Ct) | Slope  | Efficiency (%) | Dynamic range (Ct) |
| <i>B2M</i>   | -3.33        | 99.6           | 17.18-31.68        | -3.38  | 97.7           | 17.46-31.25        |
| <i>GAPDH</i> | -3.37        | 98             | 16.43-30.91        | -3.40  | 96.7           | 17.34-31.36        |
| <i>HPRT1</i> | -3.39        | 97.1           | 21.75-35.65        | -3.38  | 97.5           | 22.14-37.67        |
| <i>KIT</i>   | -3.32        | 99.7           | 18.00-32.32        | -3.30  | 101            | 19.08-32.90        |
